# Supplementary material for: Synthesis, Preliminary Bioevaluation and Computational Analysis of Caffeic Acid Analogues
Source: MDPI journal article supplement (doi:10.3390/ijms15058808), 2014-05-16
Supplement: s1 [file s1]

## Supplementary Information

**Figure S1.** Mapping of active compound **3a** in the pharmacophore.

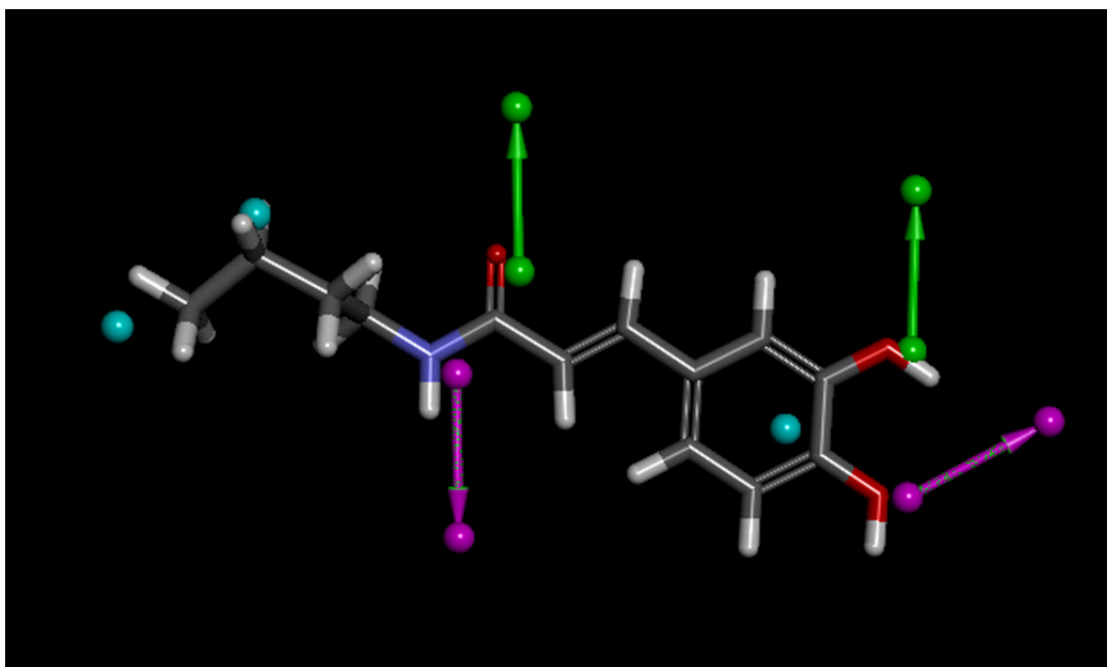

**Figure S2.** Mapping of active compound **3h** in the pharmacophore.

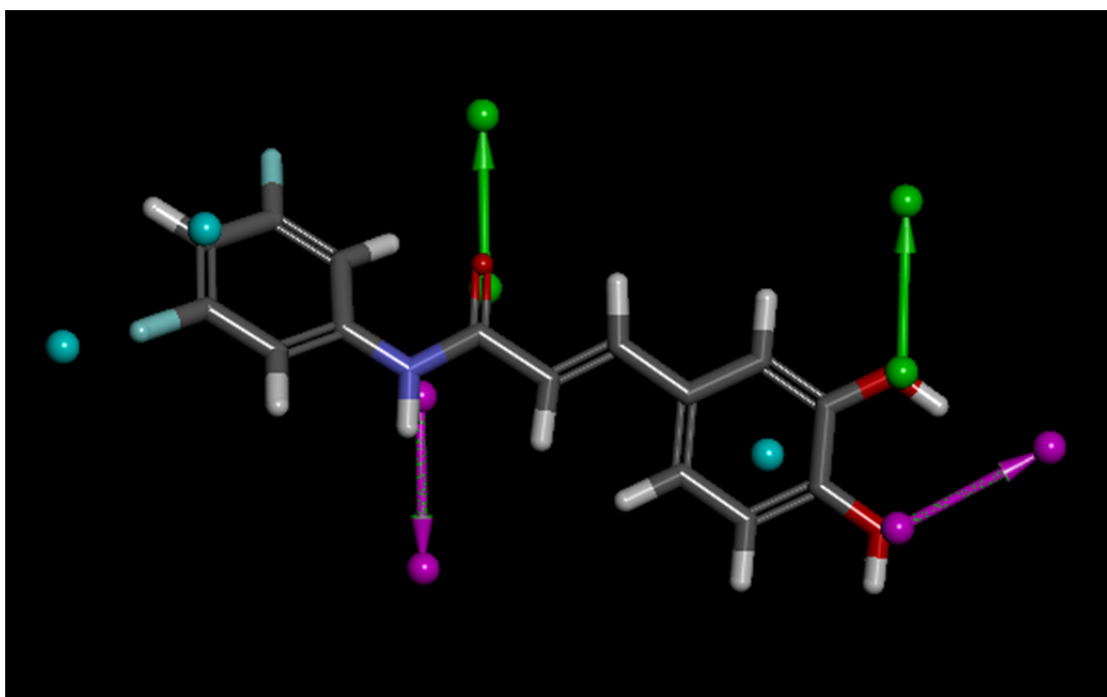

**Figure S3.** Mapping of active compound **3i** in the pharmacophore.

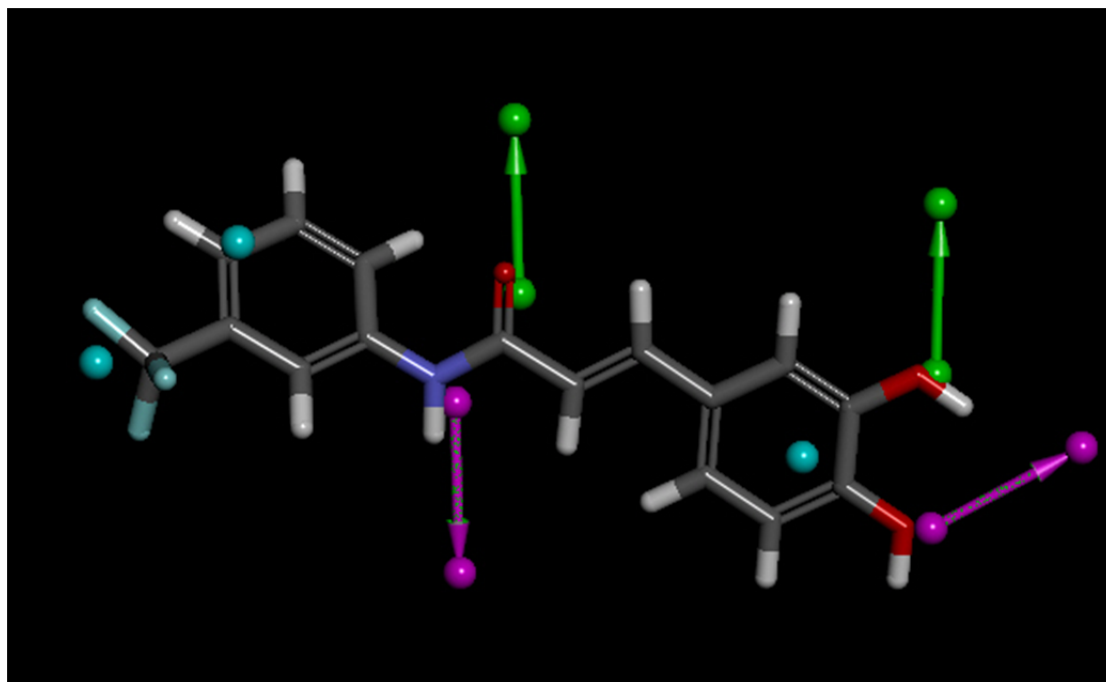

**Figure S4.** Mapping of active compound **3j** in the pharmacophore.

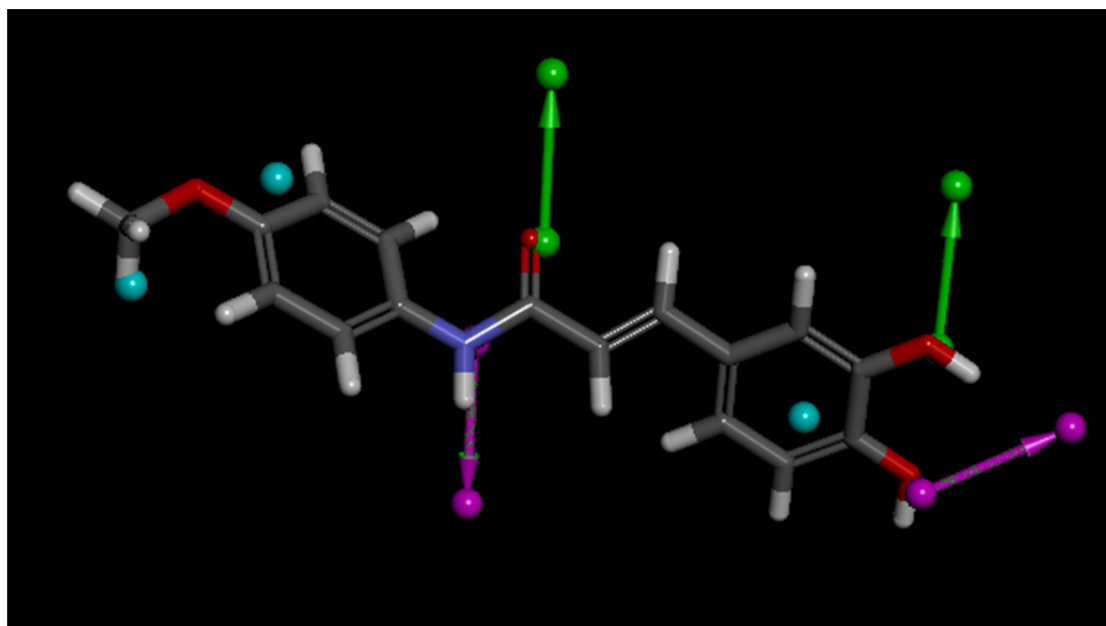

**Figure S5.** Mapping of active compound **3k** in the pharmacophore.

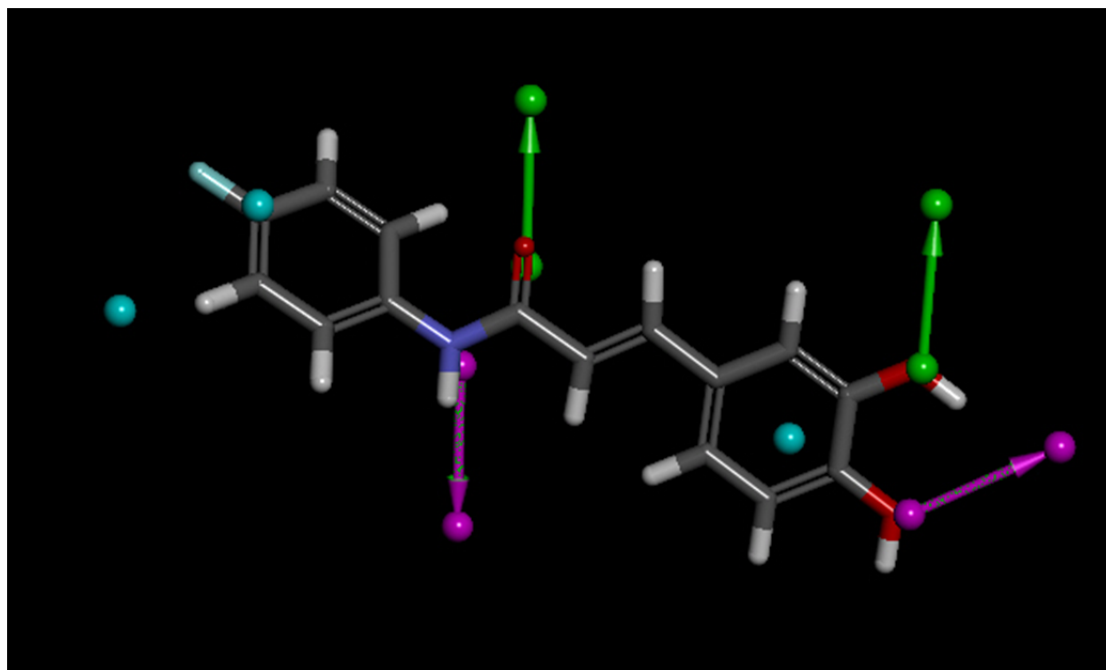

**Figure S6.** Mapping of active compound **3s** in the pharmacophore.

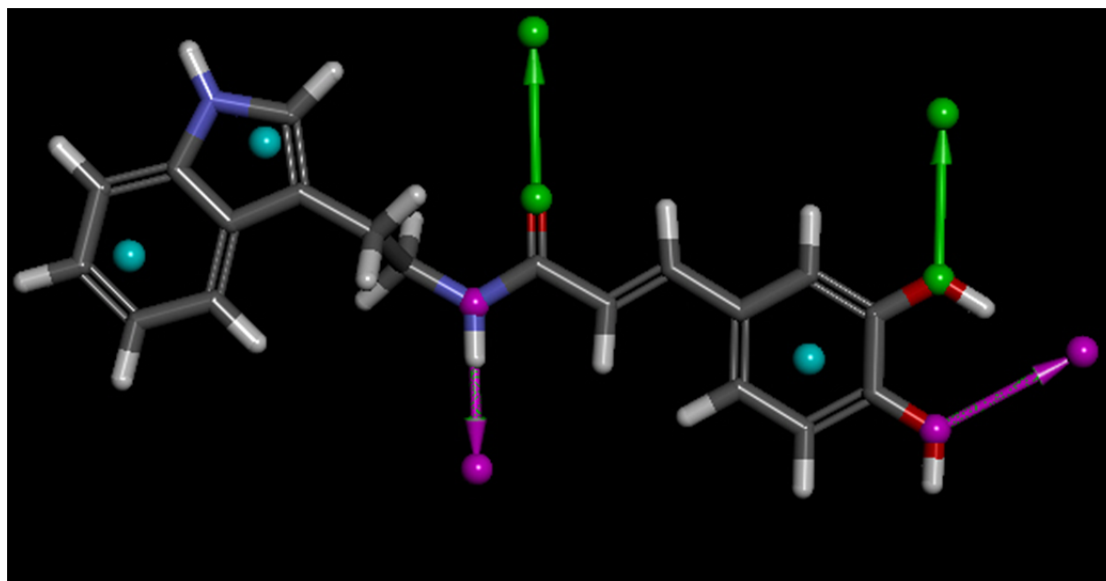

**Figure S7.** Mapping of active compound **3t** in the pharmacophore.

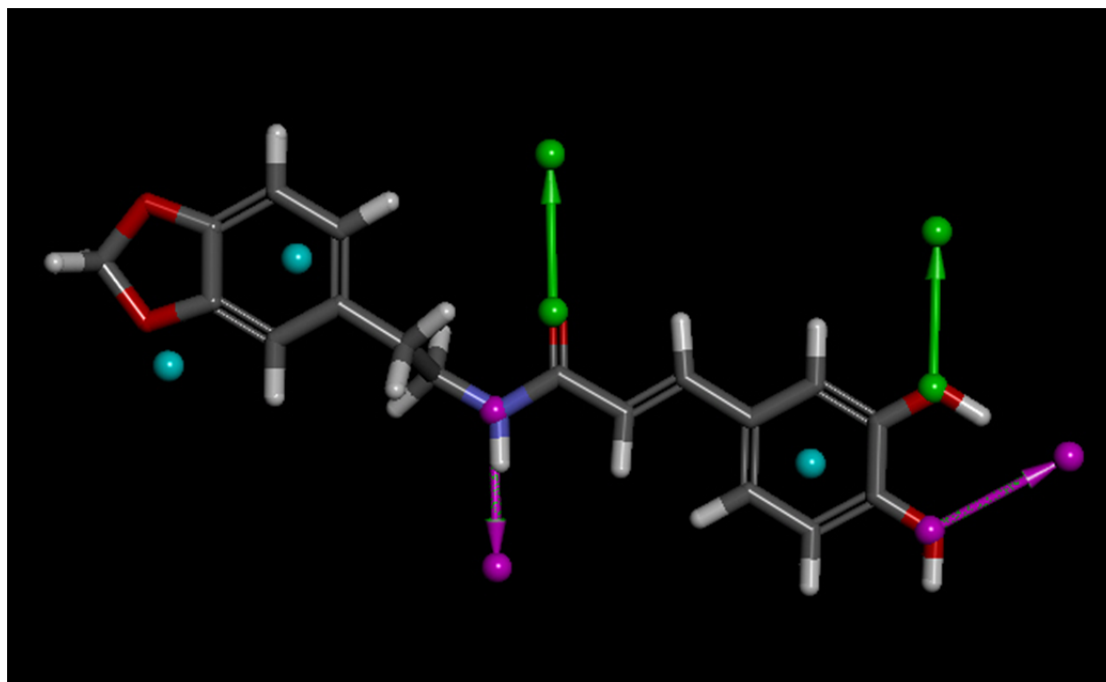

© 2014 by the authors; licensee MDPI, Basel, Switzerland. This article is an open access article distributed under the terms and conditions of the Creative Commons Attribution license (<http://creativecommons.org/licenses/by/3.0/>).
